# Supplementary material
Source: PubMed Central journal article supplement (PMC3651420)
Supplement: 1306220110_pnas.201306220SI.pdf [file 1306220110_pnas.201306220SI.pdf]

# Supporting Information

Cao et al. 10.1073/pnas.1306220110

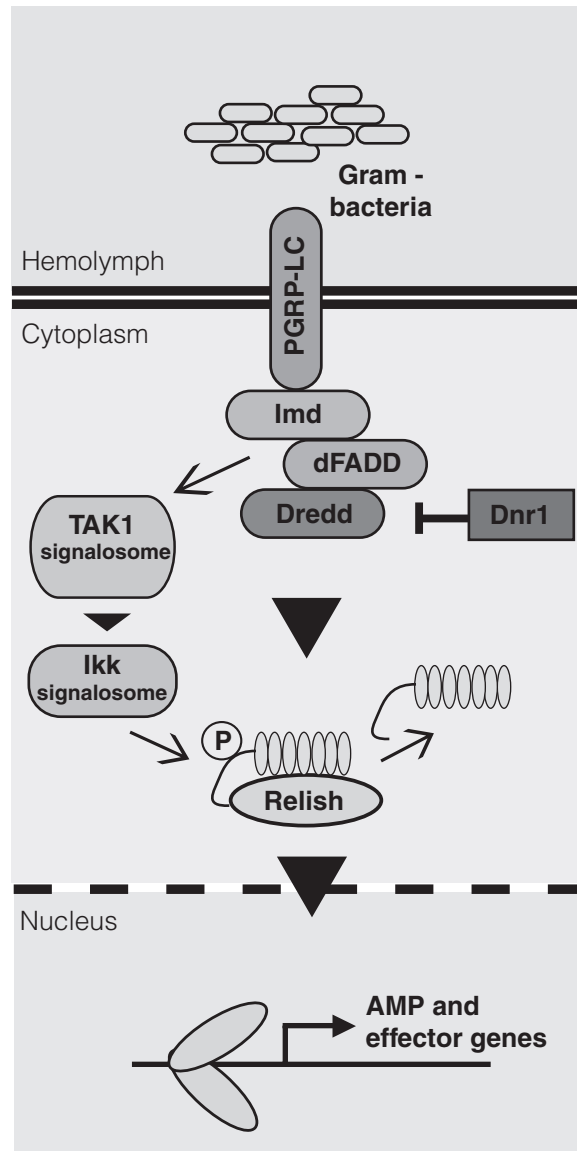

**Fig. S1.** Defense repressor 1 (*Dnr1*) is a negative regulator of the *Drosophila* immune deficiency (*Imd*) pathway. The transmembrane receptor peptidylglycan recognition protein LC (*PGRP-LC*) triggers *Imd* pathway activation after sensing presence of Gram-negative bacteria. *Imd* has an essential role in phosphorylating the NF- $\kappa$ B transcription factor Relish through activation of transforming growth factor  $\beta$  activated kinase 1 (*TAK1*) and the IKK signalosomes. Their activation requires several other proteins, including Fadd (Fas-associated death domain protein) and Dredd (death-related *ced-3/Nedd2*-like protein). Cleavage of phosphorylated Relish is dependent on the caspase Dredd. Cleaved Relish translocates to the nucleus and activates transcription of effector genes, including those encoding antimicrobial peptides (AMPs). *Dnr1* negatively regulates the *Imd* pathway by promoting proteolytic cleavage of Dredd. Thus, loss of *dnr1* will lead to increase in Relish activation and up-regulation of AMP-coding genes.





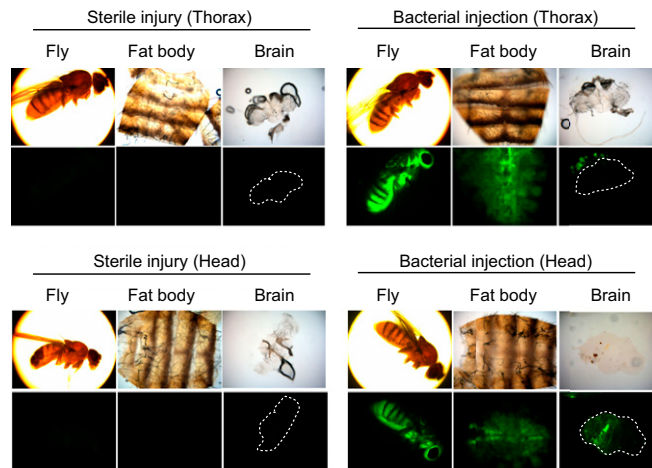

**Fig. 55.** Bacterial injection triggers AMP gene expression. One-week-old *att::GFP* flies were injected in the thorax (Upper) or head (Lower) with a mixture of Gram-negative and Gram-positive bacteria (Right) or with a sterile needle (Left). Bacterial injection in the thorax triggers *att::GFP* expression in the fat body but not in the brain, whereas bacterial injection in the head triggers *att::GFP* expression in the brain as well as in the fat body.

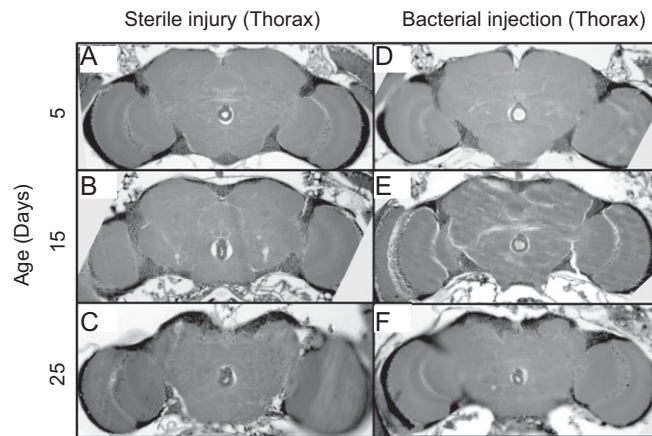

**Fig. 56.** Bacterial injection in the thorax does not trigger neurodegeneration. Wild-type (Canton-5) flies were injected in the thorax either with a sterile needle or with a mixture of Gram-negative and Gram-positive bacteria and aged for various times at 25 °C before being killed for histological analysis. Representative 5- $\mu$ m paraffin sections at approximately midbrain from flies of the indicated ages after sterile injury (A–C) or bacterial injection (D–F).

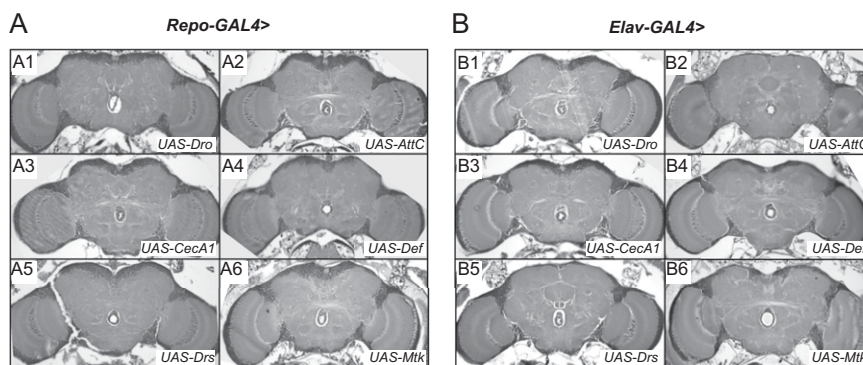

**Fig. 57.** Overexpression of AMPs in the *Drosophila* central nervous system does not cause neurodegeneration in 2-d-old flies. Representative 5- $\mu$ m paraffin sections at approximately midbrain of 2-d-old flies expressing individual AMPs in glia (*Repo-GAL4* > *UAS-AMP*) (A) or in neurons (*Elav-GAL4* > *UAS-AMP*) (B).

**Table S1. Genotypes and quantification of neurodegeneration index in each figure**

| Genotype                                                        | Time (d)            | Neurodegeneration index (mean $\pm$ SEM) |
|-----------------------------------------------------------------|---------------------|------------------------------------------|
| <b>Fig. 1B</b>                                                  |                     |                                          |
| Canton-S                                                        | 5                   | 0 (n = 9)                                |
|                                                                 | 10                  | 0.11 $\pm$ 0.11 (n = 9)                  |
|                                                                 | 15                  | 0.2 $\pm$ 0.13 (n = 10)                  |
|                                                                 | 25                  | 1.22 $\pm$ 0.15 (n = 9)                  |
|                                                                 | 35                  | 1.44 $\pm$ 0.18 (n = 9)                  |
| <i>dnr1<sup>2-133</sup></i>                                     | 5                   | 0.25 $\pm$ 0.16 (n = 8)                  |
|                                                                 | 10                  | 0.5 $\pm$ 0.19 (n = 8)                   |
|                                                                 | 15                  | 1.13 $\pm$ 0.13 (n = 8)                  |
|                                                                 | 25                  | 2.62 $\pm$ 0.22 (n = 13)                 |
|                                                                 | 35                  | 3.75 $\pm$ 0.25 (n = 8)                  |
| <i>dnr1<sup>2-133</sup>/Df(2R)X58-12</i>                        | 5                   | 0.20 $\pm$ 0.13 (n = 10)                 |
|                                                                 | 10                  | 1.20 $\pm$ 0.13 (n = 10)                 |
|                                                                 | 15                  | 1.70 $\pm$ 0.21 (n = 10)                 |
|                                                                 | 25                  | 2.10 $\pm$ 0.28 (n = 10)                 |
|                                                                 | 35                  | 3.57 $\pm$ 0.37 (n = 7)                  |
| <i>dnr1<sup>DG29507</sup>/Df(2R)X58-12</i>                      | 5                   | 1.13 $\pm$ 0.13 (n = 8)                  |
|                                                                 | 10                  | 1.82 $\pm$ 0.18 (n = 11)                 |
|                                                                 | 15                  | 2.58 $\pm$ 0.19 (n = 12)                 |
|                                                                 | 25                  | 3.13 $\pm$ 0.13 (n = 8)                  |
|                                                                 | 35                  | 3.64 $\pm$ 0.20 (n = 11)                 |
| <b>Fig. 1D</b>                                                  |                     |                                          |
| <i>dnr1<sup>2-133</sup>; UAS-dnr1/+</i>                         | 25                  | 2.56 $\pm$ 0.18 (n = 9)                  |
| <i>dnr1<sup>2-133</sup>; Actin5C-Gal4/+</i>                     | 25                  | 2.33 $\pm$ 0.24 (n = 9)                  |
| <i>dnr1<sup>2-133</sup>; Actin5C-Gal4/ UAS-dnr1</i>             | 25                  | 1.33 $\pm$ 0.21 (n = 6)                  |
| <b>Fig. 2B</b>                                                  |                     |                                          |
| <i>dnr1<sup>2-133</sup></i>                                     | 25                  | 2.75 $\pm$ 0.25 (n = 8)                  |
| <i>dnr1<sup>2-133</sup>; relish<sup>E20</sup>/Df(3R)ED05331</i> | 25                  | 1.90 $\pm$ 0.20 (n = 10)                 |
| <i>dnr1<sup>2-133</sup>; relish<sup>E20/E38</sup></i>           | 25                  | 1.67 $\pm$ 0.18 (n = 6)                  |
| <b>Fig. 3B</b>                                                  |                     |                                          |
| Noninjected                                                     | 5                   | 0.11 $\pm$ 0.08 (n = 18)                 |
|                                                                 | 15                  | 0.12 $\pm$ 0.06 (n = 31)                 |
|                                                                 | 25                  | 0.24 $\pm$ 0.11 (n = 17)                 |
| Sterile injury                                                  | 5                   | 1.89 $\pm$ 0.46 (n = 20)                 |
|                                                                 | 15                  | 0.53 $\pm$ 0.21 (n = 28)                 |
|                                                                 | 25                  | 1.12 $\pm$ 0.36 (n = 16)                 |
| Bacterial injection                                             | 5                   | 1.03 $\pm$ 0.23 (n = 29)                 |
|                                                                 | 15                  | 1.79 $\pm$ 0.27 (n = 32)                 |
|                                                                 | 25                  | 3.14 $\pm$ 0.28 (n = 35)                 |
| <b>Fig. 4B</b>                                                  |                     |                                          |
| <i>Elav-GAL4/+</i>                                              | Sterile injury      | 1.63 $\pm$ 0.26 (n = 8)                  |
|                                                                 | Bacterial injection | 3.27 $\pm$ 0.19 (n = 11)                 |
| <i>Elav-GAL4 &gt; UAS-relishRNAi</i>                            | Sterile injury      | 1.30 $\pm$ 0.21 (n = 10)                 |
|                                                                 | Bacterial injection | 1.43 $\pm$ 0.25 (n = 14)                 |
| <i>Repo-GAL4/+</i>                                              | Sterile injury      | 1.56 $\pm$ 0.44 (n = 9)                  |
|                                                                 | Bacterial injection | 3.78 $\pm$ 0.22 (n = 9)                  |
| <i>Repo-GAL4 &gt; UAS-relishRNAi</i>                            | Sterile injury      | 1.18 $\pm$ 0.18 (n = 11)                 |
|                                                                 | Bacterial injection | 1.17 $\pm$ 0.31 (n = 6)                  |
| <b>Fig. 5C</b>                                                  |                     |                                          |
| <i>repo-Gal4 &gt; UAS-Drosocin</i>                              | 25                  | 2.50 $\pm$ 0.27 (n = 8)                  |
| <i>repo-Gal4 &gt; UAS-Attacin</i>                               | 25                  | 3.13 $\pm$ 0.23 (n = 8)                  |
| <i>repo-Gal4 &gt; UAS-Cecropin A1</i>                           | 25                  | 2.75 $\pm$ 0.31 (n = 8)                  |
| <i>repo-Gal4 &gt; UAS-Defensin</i>                              | 25                  | 2.88 $\pm$ 0.29 (n = 8)                  |
| <i>repo-Gal4 &gt; UAS-Drosomycin</i>                            | 25                  | 3.38 $\pm$ 0.26 (n = 8)                  |
| <i>repo-Gal4 &gt; UAS-Metchnikowin</i>                          | 25                  | 2.75 $\pm$ 0.36 (n = 8)                  |
| <i>repo-Gal4 &gt; UAS-GFP</i>                                   | 25                  | 1.75 $\pm$ 0.25 (n = 8)                  |
| <i>repo-Gal4/+</i>                                              | 25                  | 1.63 $\pm$ 0.18 (n = 8)                  |
| <i>UAS-Drosocin/+</i>                                           | 25                  | 1.38 $\pm$ 0.18 (n = 8)                  |
| <i>UAS-Attacin/+</i>                                            | 25                  | 1.25 $\pm$ 0.16 (n = 8)                  |
| <i>UAS-Cecropin A1/+</i>                                        | 25                  | 2.25 $\pm$ 0.36 (n = 8)                  |
| <i>UAS-Defensin/+</i>                                           | 25                  | 1.38 $\pm$ 0.18 (n = 8)                  |
| <i>UAS-Drosomycin/+</i>                                         | 25                  | 1.88 $\pm$ 0.23 (n = 8)                  |
| <i>UAS-Metchnikowin/+</i>                                       | 25                  | 2.75 $\pm$ 0.25 (n = 8)                  |

**Table S1. Cont.**

| Genotype                                                | Time (d) | Neurodegeneration index (mean $\pm$ SEM) |
|---------------------------------------------------------|----------|------------------------------------------|
| <i>elav-Gal4</i> > <i>UAS-Drosocin</i>                  | 25       | 2.13 $\pm$ 0.23 (n = 8)                  |
| <i>elav-Gal4</i> > <i>UAS-Attacin</i>                   | 25       | 2.00 $\pm$ 0.26 (n = 8)                  |
| <i>elav-Gal4</i> > <i>UAS-Cecropin A1</i>               | 25       | 2.50 $\pm$ 0.19 (n = 8)                  |
| <i>elav-Gal4</i> > <i>UAS-Defensin</i>                  | 25       | 2.13 $\pm$ 0.23 (n = 8)                  |
| <i>elav-Gal4</i> > <i>UAS-Drosomycin</i>                | 25       | 3.00 $\pm$ 0.27 (n = 8)                  |
| <i>elav-Gal4</i> > <i>UAS-Metchnikowin</i>              | 25       | 2.88 $\pm$ 0.29 (n = 8)                  |
| <i>elav-Gal4</i> > <i>UAS-GFP</i>                       | 25       | 1.50 $\pm$ 0.27 (n = 8)                  |
| <i>elav-Gal4</i> <sup>+</sup>                           | 25       | 1.25 $\pm$ 0.16 (n = 8)                  |
| Fig. 5E                                                 |          |                                          |
| <i>repo-Gal4</i> > <i>UAS-Defensin</i>                  | 25       | 2.88 $\pm$ 0.29 (n = 8)                  |
| <i>repo-Gal4</i> > <i>UAS-Defensin,UAS-relishRNAi</i>   | 25       | 3.10 $\pm$ 0.23 (n = 10)                 |
| <i>repo-Gal4</i> > <i>UAS-Drosomycin</i>                | 25       | 3.38 $\pm$ 0.26 (n = 8)                  |
| <i>repo-Gal4</i> > <i>UAS-Drosomycin,UAS-relishRNAi</i> | 25       | 2.80 $\pm$ 0.37 (n = 5)                  |

**Table S2. Primer sequences for thermal asymmetric interlaced (TAIL) PCR**

| Name   | Primer (5'-3')           |
|--------|--------------------------|
| TAIL1  | NTCGASTWTSWGTT           |
| 2223   | CGTCCGCACACAACCTTCC      |
| Pry4   | CAATCATATCGCTGTCTCACTCA  |
| TAIL2  | NGTCGASWGANAWGAA         |
| P5out2 | AACCTTTCCTCTCAACAAGCAA   |
| 2231   | TCGCTGTCTCACTCAGACTC     |
| TAIL3  | WGTGNAGWANCANAGA         |
| P5out1 | CGGTAAGCTTCGGCTATCGAC    |
| 2229   | CCTTCACTCGCACTTATTGCAAGC |

**Table S3. Primer sequences for qPCR**

| Gene                | Forward primer (5'-3')   | Reverse primer (5'-3')   |
|---------------------|--------------------------|--------------------------|
| <i>dnr1</i>         | CATTGTCAACCTGCCAAC       | GCGACAGACCTTCTCCAGAC     |
| <i>rp17</i>         | CCAATCTACGTGTGCACTTCA    | ACTCCTTCTGGTCGATGACG     |
| <i>Actin</i>        | CGAAGAAGTTGCTGCTCTGGTTGT | GGACGTCCCACAATCGATGGGAAG |
| <i>rp49</i>         | AAGAAGCGCACCAAGCACTTCATC | TCTGTTGTCGATACCTTGGGCTT  |
| <i>Attacin C</i>    | CTGCACTGGACTACTCCACATCA  | CGATCCTGCGACTGCCAAAGATTG |
| <i>Cecropin A1</i>  | CATTGGACAATCGGAAGCTGGGTG | TAATCATCGTGGTCAACCTCGGGC |
| <i>Diptericin B</i> | AGGATTCGATCTGAGCCTCAACGG | TGAAGGTATACACTCCACCGGCTC |
| <i>Drosomycin</i>   | AGTACTGTTCGCCCTCTCGCTG   | CCTTGTATCTCCGACAGGCAGT   |
| <i>Metchnikowin</i> | CATCAATCAATCCCGCCACCGAG  | AAATGGGTCCTGGTGACGATGAG  |

*dnr1*, defense repressor 1; *rp17*, ribosomal protein L17; *rp49*, ribosomal protein 49.
